# 1 SUPPLEMENTARY MATERIAL

2

3 **Supplementary material 1. Received sound pressure levels and the behavioral responses they elicited.** Only the highest scoring  
 4 behaviors for each sound test are represented here (i.e. not all occurrences of each response types are shown). Large body pattern/fin:  
 5 large body pattern change and/or fast fin movements, Small body pattern/fin: small body pattern change and/or slow fin movements.  
 6 The dashed lines represent the mean SPL value for that response.

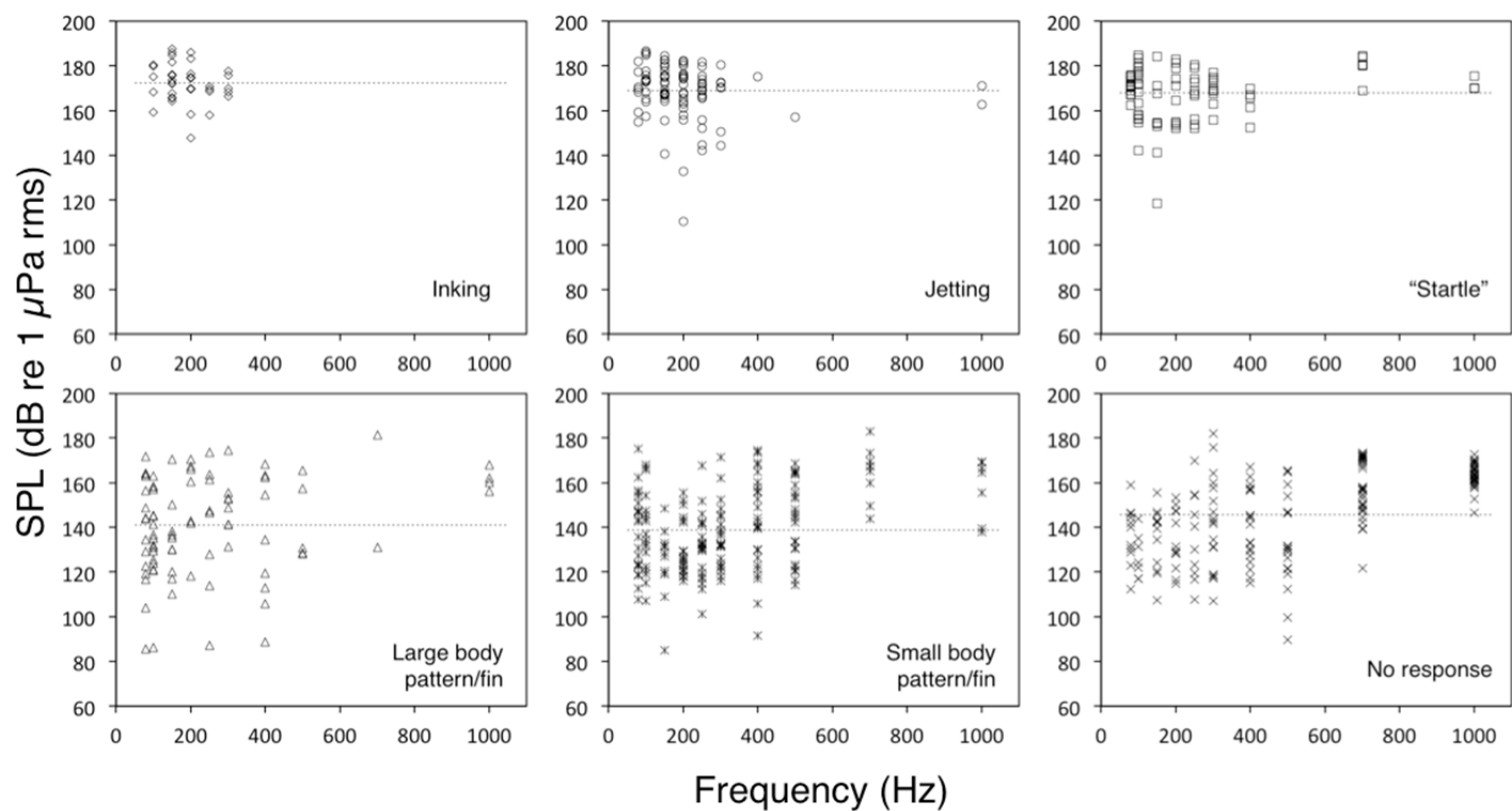

7

1 **Supplementary material 2. Vector field of the particle acceleration at 150 Hz for a calibrated sound level of 165 dB.** The  
2 speaker is represented in blue, at the (0, 0) position in the tank. This figure illustrates the importance of taking the distance of an  
3 animal to the speaker into account, since the sound field is very variable depending on the location in the tank. Vectors are to scale,  
4 the  $1 \text{ m.s}^{-2}$  scale is noted on the figure.  
5  
6

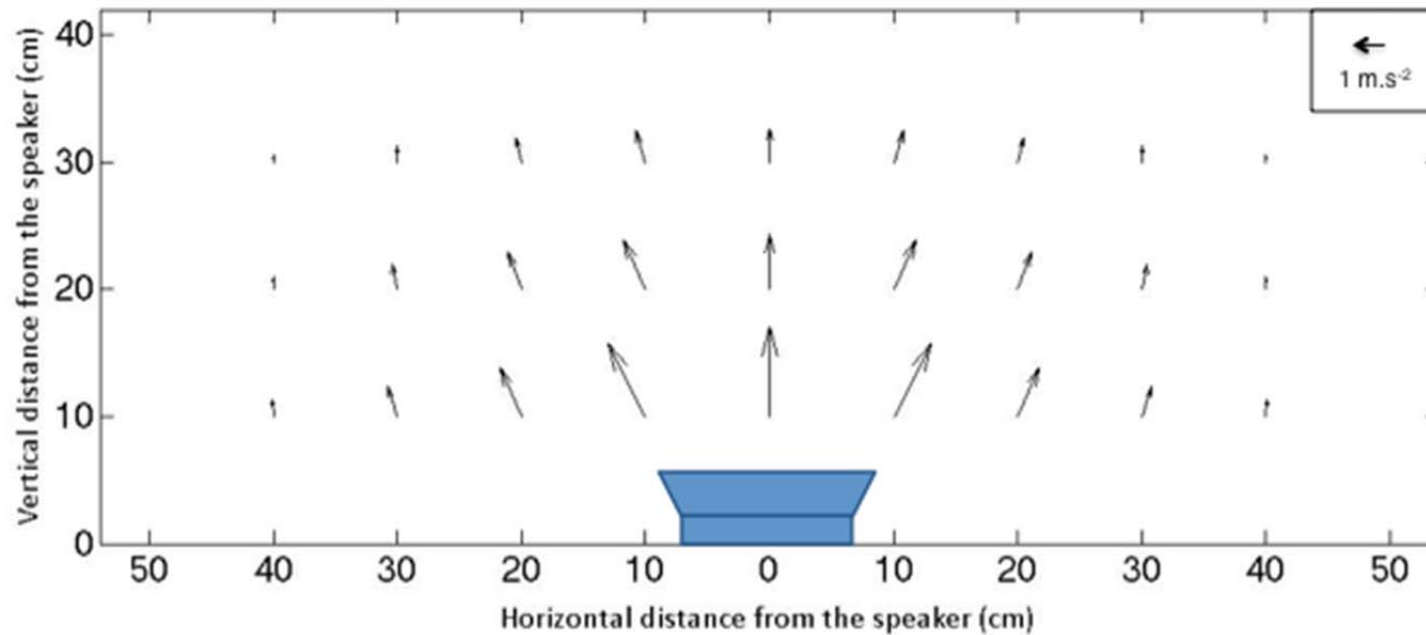

1 **Supplementary material 3. Power spectra.** A: power spectrum from a 300 Hz sound at  
2 a calibrated sound level of 150 dB (received level), as recorded by a calibrated  
3 hydrophone placed 12.5 cm above the speaker. B: power spectrum from the ambient  
4 noise recorded by the same hydrophone at the same position.  
5

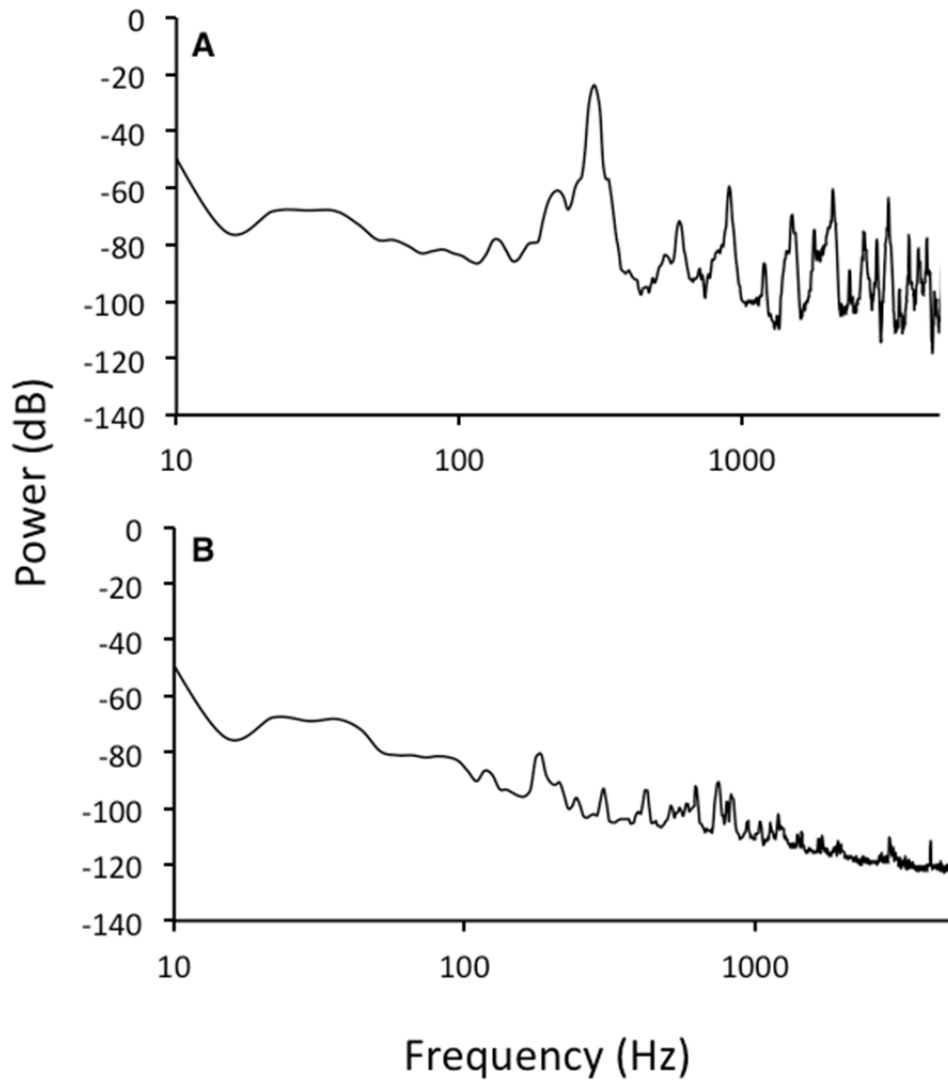

6
